# Supplementary material for: Biomimetic design for enhancing the peroxidase mimicking activity of hemin
Source: Royal Society of Chemistry journal article supplement (doi:10.1039/c9nr03506k), 2019-01-01
Supplement: c9nr03506k1.pdf [file c9nr03506k1.pdf]

## Supporting information

### Biomimetic design for enhancing the peroxidase mimicking activity of hemin

Weiwei Wu,<sup>a,b</sup> Qingqing Wang,<sup>a</sup> Jinxing Chen,<sup>a,b</sup> Liang Huang,<sup>a,b</sup> He Zhang,<sup>a,b</sup> Kai Rong<sup>a,b</sup> and Shaojun Dong<sup>\*a,b</sup>

<sup>a</sup> State Key Laboratory of Electroanalytical Chemistry, Changchun Institute of Applied Chemistry, Chinese Academy of Sciences, Changchun, Jilin 130022, PR China

<sup>b</sup> University of Science and Technology of China, Hefei, Anhui 230026, PR China

\*Corresponding Author. Tel: +86 431 85692886. Fax: +86 431 85689711.

E-mail: dongsj@ciac.ac.cn

### Supporting Figures

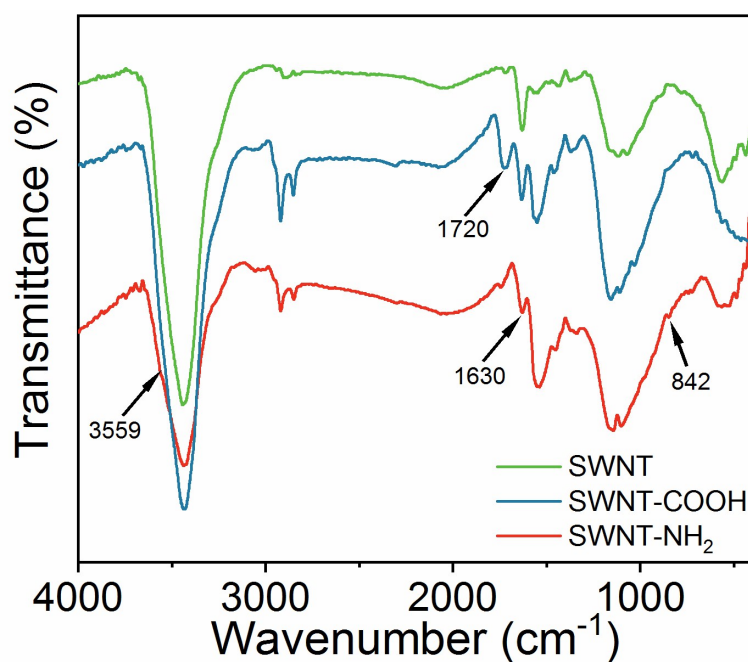

**Fig.S1** FT-IR spectra of SWNT@hemin, SWNT-COOH@hemin and SWNT-

NH<sub>2</sub>@hemin.

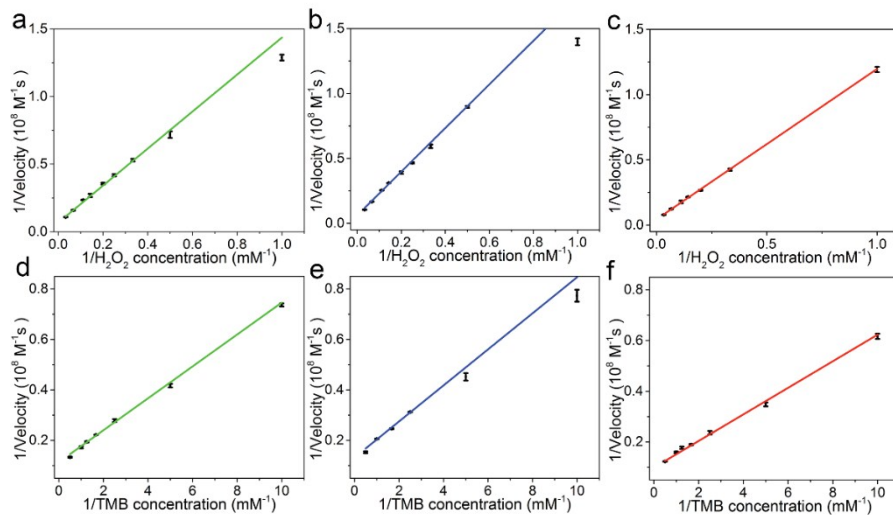

**Fig.S2** Lineweaver-Burk plots of SWNT@hemin, SWNT-COOH@hemin and SWNT-NH<sub>2</sub>@hemin obtained from Fig.4.

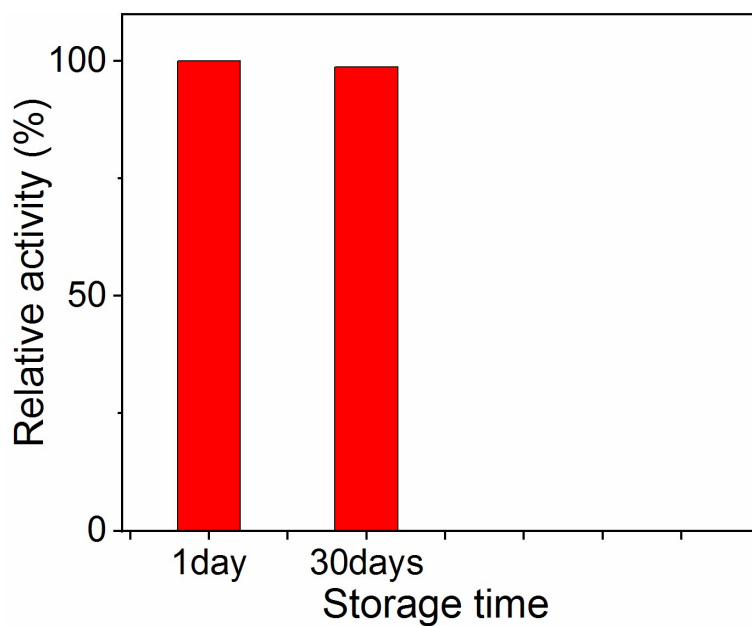

**Fig.S3** The stability of SWNT-NH<sub>2</sub>@hemin.

**Table.S1** H<sub>2</sub>O<sub>2</sub> and glucose detection by colorimetric method

with peroxidase mimics.

| Nanoyzmes                                                  | H <sub>2</sub> O <sub>2</sub> |         | Glucose        |         | References |
|------------------------------------------------------------|-------------------------------|---------|----------------|---------|------------|
|                                                            | Linear range                  | LOD     | Linear range   | LOD     |            |
| SWNT-NH <sub>2</sub>                                       | 0.05-0.35 mM                  | 1.82 μM | 0.025-1.625 mM | 5.4 μM  | This work  |
| CA-BiPtNC@GO                                               | 0.01-1500 μM                  | 10 nM   | 0.5-1000 μM    | 0.05 μM | Ref.1      |
| Fe-g-C <sub>3</sub> N <sub>4</sub>                         | 0.5-10 μM                     | 0.05 μM | 0.5-10 μM      | 0.5 μM  | Ref.2      |
| Co <sub>3</sub> O <sub>4</sub> NPs                         | 29-580 μM                     | 15 μM   | 0.02-0.2 mM    | 5 μM    | Ref.3      |
| 3D-printed Fe <sub>3</sub> O <sub>4</sub> multi-well plate | 1-100 μM                      | 0.6 μM  | 5-500 μM       | 5.2 μM  | Ref.4      |
| LaNiO <sub>3</sub> nanocubes                               | 0-30 μM /40-500 μM            | ---     | 10-50 μM       | 8.16 μM | Ref.5      |
| GOx@ZIF-8(NiPd) Nanoflower                                 | ---                           | ---     | 0.01-0.3 mM    | 9.2 μM  | Ref.6      |
| Carbon NPs                                                 | 1-40 μM                       | 1 μM    | ---            | 20 μM   | Ref.7      |
| Fe <sub>3</sub> O <sub>4</sub> NPs                         | 5-100 μM                      | 3 μM    | 50-1000 μM     | 30 μM   | Ref.8      |
| Au@Ag Nanorods                                             | 0.01-10 mM                    | 6 μM    | 0.05-20 mM     | 39 μM   | Ref.9      |
| GO@SiO <sub>2</sub> @CeO <sub>2</sub> nanosheets           | 50nM-1 μM                     | 9 nM    | 1.5-25 mM      | 0.2 mM  | Ref.10     |

**References:**

1. Y. Liu, Y. Zheng, Z. Chen, Y. Qin and R. Guo, *Small*, 2019, **15**, e1804987.
2. J. Tian, Q. Liu, A. M. Asiri, A. H. Qusti, A. O. Al-Youbi and X. Sun, *Nanoscale*, 2013, **5**, 11604-11609.
3. H. Jia, D. Yang, X. Han, J. Cai, H. Liu and W. He, *Nanoscale*, 2016, **8**, 5938-5945.
4. C.-K. Su and J.-C. Chen, *Sens. Actuators, B.*, 2017, **247**, 641-647.
5. X. Wang, W. Cao, L. Qin, T. Lin, W. Chen, S. Lin, J. Yao, X. Zhao, M. Zhou, C. Hang and H. Wei, *Theranostics*, 2017, **7**, 2277-2286.
6. Q. Wang, X. Zhang, L. Huang, Z. Zhang and S. Dong, *Angew. Chem., Int. Ed. Engl.*, 2017, **56**, 16082-16085.

7. X. Wang, K. Qu, B. Xu, J. Ren and X. Qu, *Nano Res.*, 2011, **4**, 908-920.
8. H. Wei and E. Wang, *Anal. Chem.*, 2008, **80**, 2250-2254.
9. L. Han, C. Li, T. Zhang, Q. Lang and A. Liu, *ACS Appl. Mater. Interfaces*, 2015, **7**, 14463-14470.
10. L. Deng, C. Chen, C. Zhu, S. Dong and H. Lu, *Biosens. Bioelectron.*, 2014, **52**, 324-329.
